# Supplementary material for: A theoretical study on novel alkaline earth-based excess electron compounds: unique alkalides with considerable nonlinear optical responses
Source: Royal Society of Chemistry journal article supplement (doi:10.1039/c4cp04951a), 2015-01-01
Supplement: c4cp04951a1.pdf [file c4cp04951a1.pdf]

Electronic Supplementary Information (ESI) available for:

**Theoretical Study on Novel Alkaline Earth-Based Excess Electron  
Compounds: Unique Alkalides with Considerable Nonlinear Optical  
Responses**

Wei-Ming Sun, Di Wu, Ying Li\*, Jia-Yuan Liu, Hui-Min He, Zhi-Ru Li

*Institute of Theoretical Chemistry, State Key Laboratory of Theoretical and Computational Chemistry,*

*Jilin University, Changchun 130023, People's Republic of China*

E-mail address: [liyingedu@jlu.edu.cn](mailto:liyingedu@jlu.edu.cn)

## 1. Figures and Table

**Fig. S1.** Structures and HOMOs of isolated  $\text{Mg}(\text{NH}_3)_6$  and  $\text{Ca}(\text{NH}_3)_6$  amines.

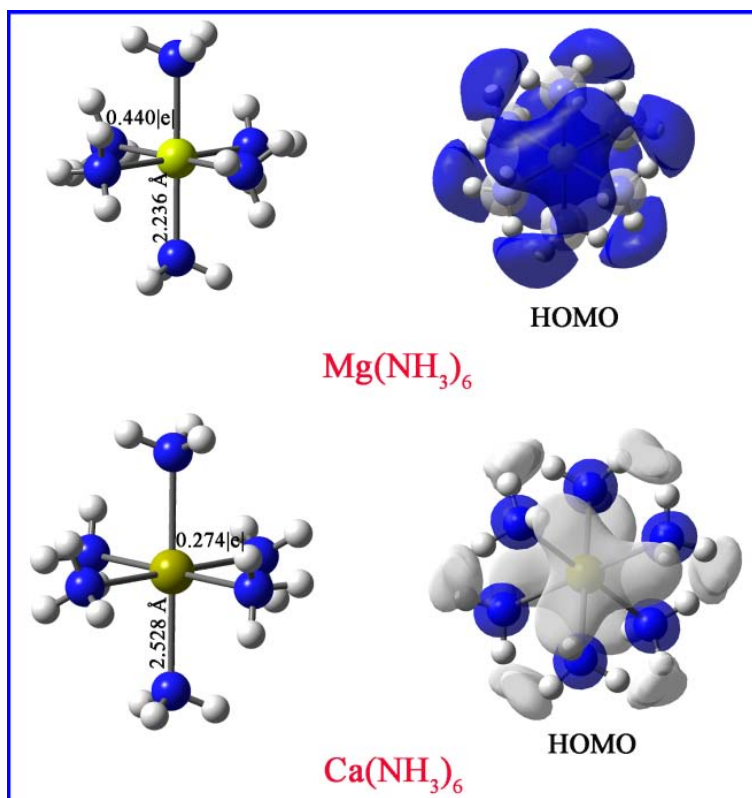

**Fig. S2.** Crucial transitions of the  $\text{Mg}(\text{NH}_3)_6$ -based compounds.

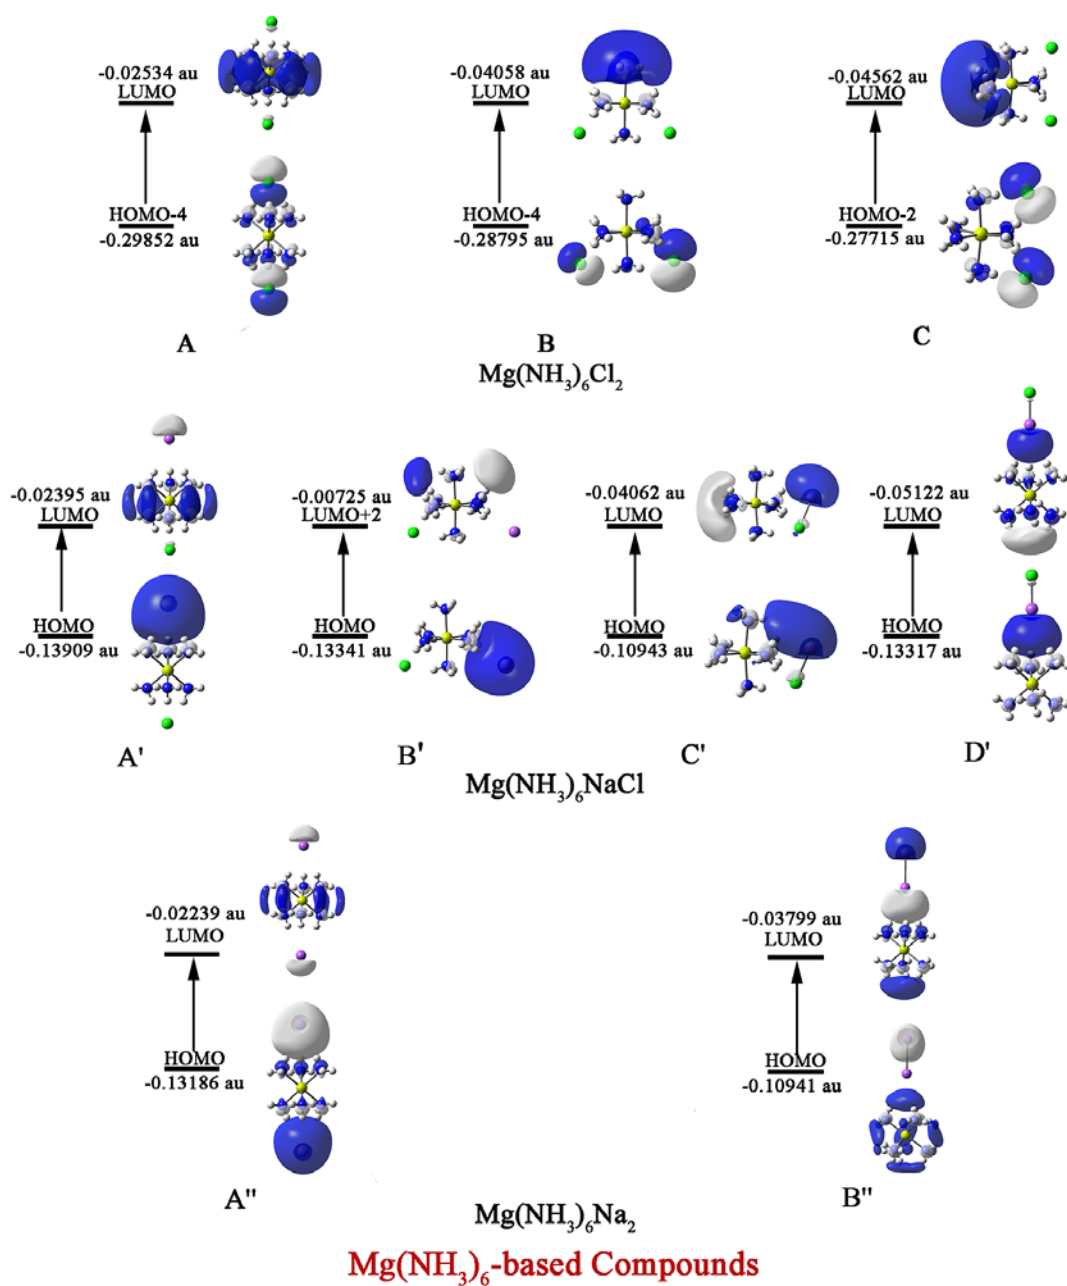

**Fig. S3.** Crucial transitions of the  $\text{Ca}(\text{NH}_3)_6$ -based compounds.

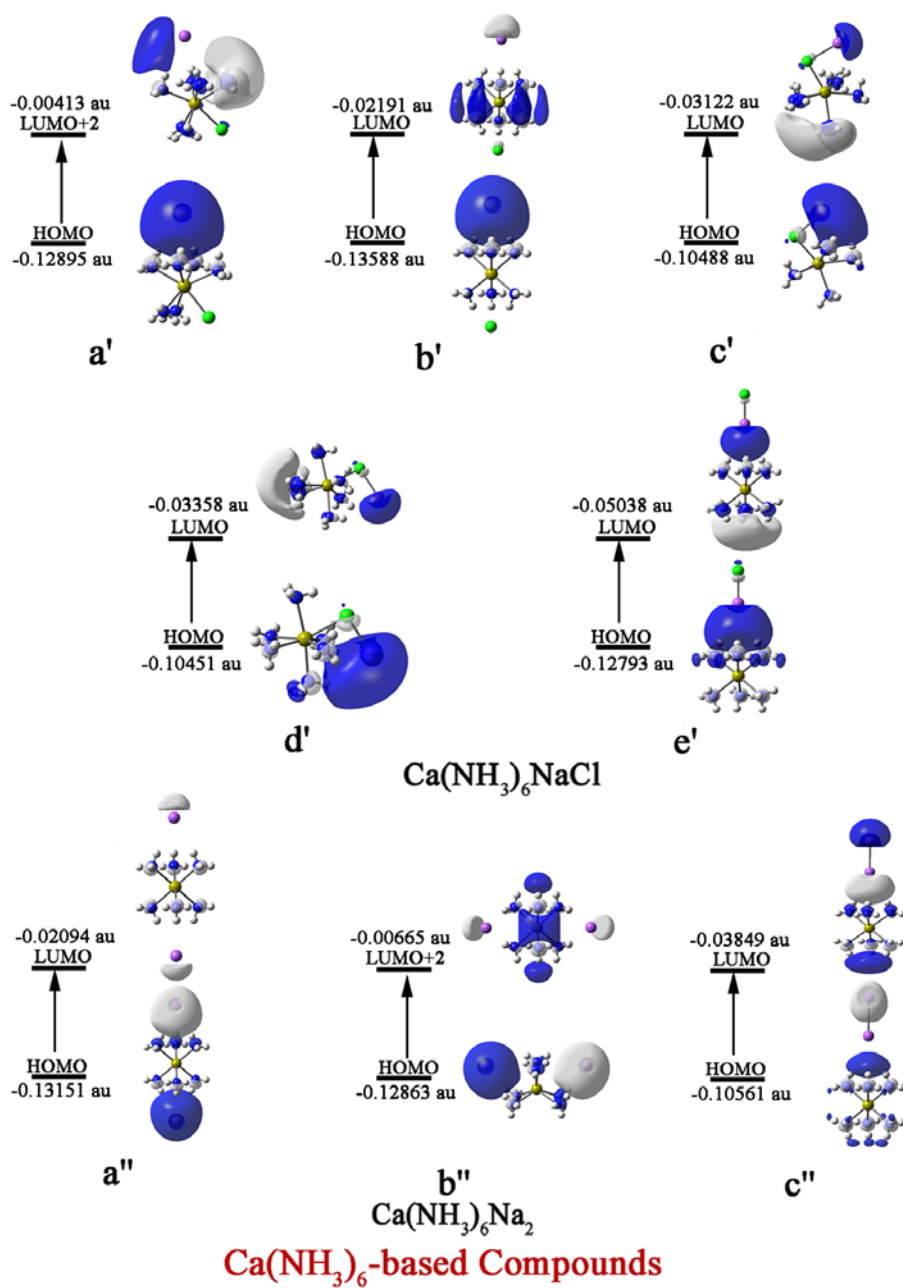

**Table S1** Selected dissociation channels and ZPVE-corrected dissociation energies ( $D_e$ ) for the  $\text{Mg}(\text{NH}_3)_6^-$  and  $\text{Ca}(\text{NH}_3)_6^-$ -based complexes at the CAM-B3LYP/6-311++G(d, p) level.

| Complex                               | Isomers    | Dissociation channels                                                                              | $D_e/\text{kcal}\cdot\text{mol}^{-1}$ |
|---------------------------------------|------------|----------------------------------------------------------------------------------------------------|---------------------------------------|
| $\text{Mg}(\text{NH}_3)_6\text{Cl}_2$ | <b>A</b>   | $\text{Mg}(\text{NH}_3)_6\text{Cl}_2 \rightarrow \text{Mg}(\text{NH}_3)_6 + 2\text{Cl}$            | 224.9                                 |
|                                       |            | $\text{Mg}(\text{NH}_3)_6\text{Cl}_2 \rightarrow \text{Mg} + 6\text{NH}_3 + 2\text{Cl}$            | 258.2                                 |
|                                       | <b>B</b>   | $\text{Mg}(\text{NH}_3)_6\text{Cl}_2 \rightarrow \text{Mg}(\text{NH}_3)_6 + 2\text{Cl}$            | 217.8                                 |
|                                       |            | $\text{Mg}(\text{NH}_3)_6\text{Cl}_2 \rightarrow \text{Mg} + 6\text{NH}_3 + 2\text{Cl}$            | 251.1                                 |
|                                       | <b>C</b>   | $\text{Mg}(\text{NH}_3)_6\text{Cl}_2 \rightarrow \text{Mg}(\text{NH}_3)_6 + 2\text{Cl}$            | 211.6                                 |
|                                       |            | $\text{Mg}(\text{NH}_3)_6\text{Cl}_2 \rightarrow \text{Mg} + 6\text{NH}_3 + 2\text{Cl}$            | 244.9                                 |
| $\text{Mg}(\text{NH}_3)_6\text{NaCl}$ | <b>A'</b>  | $\text{Mg}(\text{NH}_3)_6\text{NaCl} \rightarrow \text{Mg}(\text{NH}_3)_6 + \text{Na} + \text{Cl}$ | 128.5                                 |
|                                       |            | $\text{Mg}(\text{NH}_3)_6\text{NaCl} \rightarrow \text{Mg} + 6\text{NH}_3 + \text{Na} + \text{Cl}$ | 161.8                                 |
|                                       | <b>B'</b>  | $\text{Mg}(\text{NH}_3)_6\text{NaCl} \rightarrow \text{Mg}(\text{NH}_3)_6 + \text{Na} + \text{Cl}$ | 123.7                                 |
|                                       |            | $\text{Mg}(\text{NH}_3)_6\text{NaCl} \rightarrow \text{Mg} + 6\text{NH}_3 + \text{Na} + \text{Cl}$ | 157.0                                 |
|                                       | <b>C'</b>  | $\text{Mg}(\text{NH}_3)_6\text{NaCl} \rightarrow \text{Mg}(\text{NH}_3)_6 + \text{Na} + \text{Cl}$ | 116.1                                 |
|                                       |            | $\text{Mg}(\text{NH}_3)_6\text{NaCl} \rightarrow \text{Mg}(\text{NH}_3)_6 + \text{NaCl}$           | 23.0                                  |
|                                       | <b>D'</b>  | $\text{Mg}(\text{NH}_3)_6\text{NaCl} \rightarrow \text{Mg} + 6\text{NH}_3 + \text{Na} + \text{Cl}$ | 149.4                                 |
|                                       |            | $\text{Mg}(\text{NH}_3)_6\text{NaCl} \rightarrow \text{Mg}(\text{NH}_3)_6 + \text{Na} + \text{Cl}$ | 102.4                                 |
|                                       |            | $\text{Mg}(\text{NH}_3)_6\text{NaCl} \rightarrow \text{Mg}(\text{NH}_3)_6 + \text{NaCl}$           | 9.3                                   |
|                                       |            | $\text{Mg}(\text{NH}_3)_6\text{NaCl} \rightarrow \text{Mg} + 6\text{NH}_3 + \text{Na} + \text{Cl}$ | 135.7                                 |
| $\text{Mg}(\text{NH}_3)_6\text{Na}_2$ | <b>A''</b> | $\text{Mg}(\text{NH}_3)_6\text{Na}_2 \rightarrow \text{Mg}(\text{NH}_3)_6 + 2\text{Na}$            | 31.5                                  |
|                                       |            | $\text{Mg}(\text{NH}_3)_6\text{Na}_2 \rightarrow \text{Mg} + 6\text{NH}_3 + 2\text{Na}$            | 64.8                                  |
|                                       | <b>B''</b> | $\text{Mg}(\text{NH}_3)_6\text{Na}_2 \rightarrow \text{Mg}(\text{NH}_3)_6 + 2\text{Na}$            | 18.8                                  |
|                                       |            | $\text{Mg}(\text{NH}_3)_6\text{Na}_2 \rightarrow \text{Mg}(\text{NH}_3)_6 + \text{Na}_2$           | 2.9                                   |
|                                       |            | $\text{Mg}(\text{NH}_3)_6\text{Na}_2 \rightarrow \text{Mg} + 6\text{NH}_3 + 2\text{Na}$            | 52.1                                  |
| $\text{Ca}(\text{NH}_3)_6\text{NaCl}$ | <b>a'</b>  | $\text{Ca}(\text{NH}_3)_6\text{NaCl} \rightarrow \text{Ca}(\text{NH}_3)_6 + \text{Na} + \text{Cl}$ | 134.0                                 |
|                                       |            | $\text{Ca}(\text{NH}_3)_6\text{NaCl} \rightarrow \text{Ca} + 6\text{NH}_3 + \text{Na} + \text{Cl}$ | 197.2                                 |
|                                       | <b>b'</b>  | $\text{Ca}(\text{NH}_3)_6\text{NaCl} \rightarrow \text{Ca}(\text{NH}_3)_6 + \text{Na} + \text{Cl}$ | 130.7                                 |
|                                       |            | $\text{Ca}(\text{NH}_3)_6\text{NaCl} \rightarrow \text{Ca} + 6\text{NH}_3 + \text{Na} + \text{Cl}$ | 193.9                                 |
|                                       | <b>c'</b>  | $\text{Ca}(\text{NH}_3)_6\text{NaCl} \rightarrow \text{Ca}(\text{NH}_3)_6 + \text{Na} + \text{Cl}$ | 123.8                                 |
|                                       |            | $\text{Ca}(\text{NH}_3)_6\text{NaCl} \rightarrow \text{Ca}(\text{NH}_3)_6 + \text{NaCl}$           | 30.7                                  |
|                                       | <b>d'</b>  | $\text{Ca}(\text{NH}_3)_6\text{NaCl} \rightarrow \text{Ca} + 6\text{NH}_3 + \text{Na} + \text{Cl}$ | 187.0                                 |
|                                       |            | $\text{Ca}(\text{NH}_3)_6\text{NaCl} \rightarrow \text{Ca}(\text{NH}_3)_6 + \text{Na} + \text{Cl}$ | 122.3                                 |
|                                       |            | $\text{Ca}(\text{NH}_3)_6\text{NaCl} \rightarrow \text{Ca}(\text{NH}_3)_6 + \text{NaCl}$           | 29.23                                 |
|                                       |            | $\text{Ca}(\text{NH}_3)_6\text{NaCl} \rightarrow \text{Ca} + 6\text{NH}_3 + \text{Na} + \text{Cl}$ | 185.5                                 |
|                                       | <b>e'</b>  | $\text{Ca}(\text{NH}_3)_6\text{NaCl} \rightarrow \text{Ca}(\text{NH}_3)_6 + \text{Na} + \text{Cl}$ | 102.8                                 |
|                                       |            | $\text{Ca}(\text{NH}_3)_6\text{NaCl} \rightarrow \text{Ca}(\text{NH}_3)_6 + \text{NaCl}$           | 9.7                                   |
|                                       |            | $\text{Ca}(\text{NH}_3)_6\text{NaCl} \rightarrow \text{Ca} + 6\text{NH}_3 + \text{Na} + \text{Cl}$ | 165.9                                 |
| $\text{Ca}(\text{NH}_3)_6\text{Na}_2$ | <b>a''</b> | $\text{Ca}(\text{NH}_3)_6\text{Na}_2 \rightarrow \text{Ca}(\text{NH}_3)_6 + 2\text{Na}$            | 33.2                                  |
|                                       |            | $\text{Ca}(\text{NH}_3)_6\text{Na}_2 \rightarrow \text{Ca} + 6\text{NH}_3 + 2\text{Na}$            | 96.4                                  |
|                                       | <b>b''</b> | $\text{Ca}(\text{NH}_3)_6\text{Na}_2 \rightarrow \text{Ca}(\text{NH}_3)_6 + 2\text{Na}$            | 30.8                                  |
|                                       |            | $\text{Ca}(\text{NH}_3)_6\text{Na}_2 \rightarrow \text{Ca} + 6\text{NH}_3 + 2\text{Na}$            | 94.0                                  |
|                                       | <b>c''</b> | $\text{Ca}(\text{NH}_3)_6\text{Na}_2 \rightarrow \text{Ca}(\text{NH}_3)_6 + 2\text{Na}$            | 18.6                                  |
|                                       |            | $\text{Ca}(\text{NH}_3)_6\text{Na}_2 \rightarrow \text{Ca}(\text{NH}_3)_6 + \text{Na}_2$           | 2.8                                   |
|                                       |            | $\text{Ca}(\text{NH}_3)_6\text{Na}_2 \rightarrow \text{Ca} + 6\text{NH}_3 + 2\text{Na}$            | 81.8                                  |

## 2. Cartesian coordinates

Isomer **A** of  $\text{Mg}(\text{NH}_3)_6\text{Cl}_2$  at the CAM-B3LYP/6-311++G(d, p) level

|    |             |             |             |
|----|-------------|-------------|-------------|
| N  | -1.54085883 | -0.88961526 | 1.35737015  |
| N  | -1.54085883 | 0.88961526  | -1.35737015 |
| N  | 1.54085883  | -0.88961526 | 1.35737015  |
| N  | 1.54085883  | 0.88961526  | -1.35737015 |
| N  | -0.00000000 | 1.77923052  | 1.35737015  |
| N  | 0.00000000  | -1.77923052 | -1.35737015 |
| H  | 0.81113913  | 2.38898387  | 1.30258458  |
| H  | -0.81113913 | 2.38898387  | 1.30258458  |
| H  | -0.00000000 | 1.38656973  | 2.31659089  |
| H  | -1.20080461 | 0.69328487  | -2.31659089 |
| H  | -2.47449028 | 0.49202485  | -1.30258458 |
| H  | -1.66335116 | 1.89695903  | -1.30258458 |
| H  | 1.66335116  | 1.89695903  | -1.30258458 |
| H  | 2.47449028  | 0.49202485  | -1.30258458 |
| H  | 1.20080461  | 0.69328487  | -2.31659089 |
| H  | 0.00000000  | -1.38656973 | -2.31659089 |
| H  | 0.81113913  | -2.38898387 | -1.30258458 |
| H  | -0.81113913 | -2.38898387 | -1.30258458 |
| H  | 2.47449028  | -0.49202485 | 1.30258458  |
| H  | 1.20080461  | -0.69328487 | 2.31659089  |
| H  | 1.66335116  | -1.89695903 | 1.30258458  |
| H  | -2.47449028 | -0.49202485 | 1.30258458  |
| H  | -1.66335116 | -1.89695903 | 1.30258458  |
| H  | -1.20080461 | -0.69328487 | 2.31659089  |
| Mg | 0.00000000  | 0.00000000  | 0.00000000  |
| Cl | 0.00000000  | 0.00000000  | -4.00562505 |
| Cl | 0.00000000  | 0.00000000  | 4.00562505  |

Isomer **B** of  $\text{Mg}(\text{NH}_3)_6\text{Cl}_2$  at the CAM-B3LYP/6-311++G(d, p) level

|   |             |             |             |
|---|-------------|-------------|-------------|
| N | 1.62656653  | 0.68659133  | -1.54427449 |
| N | -0.01024721 | -1.49067944 | -0.14189117 |
| N | 0.09772869  | 2.98214520  | 0.00953001  |
| N | -1.62766126 | 0.71995994  | 1.52738774  |
| N | 1.56027687  | 0.62268514  | 1.58059046  |
| N | -1.65353681 | 0.73607439  | -1.52513383 |
| H | 1.23873959  | 0.21883609  | 2.45627601  |
| H | 2.25361910  | -0.05529750 | 1.19978497  |
| H | 2.09128355  | 1.44939329  | 1.83960141  |
| H | -0.83456700 | -1.90681851 | 0.29677002  |
| H | -0.05579009 | -1.81113366 | -1.10577811 |
| H | 0.85347833  | -1.89747190 | 0.22624190  |
| H | -2.27285644 | -0.02318119 | 1.18446658  |

|    |             |             |             |
|----|-------------|-------------|-------------|
| H  | -1.35142421 | 0.44202539  | 2.46505211  |
| H  | -2.20951538 | 1.54493322  | 1.64509013  |
| H  | -2.27832132 | -0.01606884 | -1.16538284 |
| H  | -2.24859866 | 1.55448035  | -1.62087594 |
| H  | -1.40362742 | 0.46601309  | -2.47258828 |
| H  | -0.32308006 | 3.39068564  | -0.82001453 |
| H  | -0.37705159 | 3.38471132  | 0.81231857  |
| H  | 1.05793845  | 3.31197880  | 0.04252694  |
| H  | 2.27584002  | -0.03383864 | -1.16381364 |
| H  | 1.34977701  | 0.35279052  | -2.46362007 |
| H  | 2.19923859  | 1.50868807  | -1.71410765 |
| Mg | -0.00468292 | 0.69344129  | -0.01093674 |
| Cl | -3.30271814 | -1.47210544 | 0.03303763  |
| Cl | 3.31090784  | -1.46903909 | 0.03436426  |

Isomer C of  $\text{Mg}(\text{NH}_3)_6\text{Cl}_2$  at the CAM-B3LYP/6-311++G(d, p) level

|    |             |             |             |
|----|-------------|-------------|-------------|
| N  | -0.20101318 | -2.21444765 | 1.08148034  |
| N  | 1.65398631  | -0.23231664 | 2.48741354  |
| N  | -1.46563441 | 0.04181468  | -0.72257063 |
| N  | 0.20101318  | 2.21444765  | 1.08148034  |
| N  | 1.46563441  | -0.04181468 | -0.72257063 |
| N  | -1.65398631 | 0.23231664  | 2.48741354  |
| H  | 2.47684396  | -0.03644519 | -0.62964053 |
| H  | 1.22805227  | -0.87296647 | -1.28586766 |
| H  | 1.22884812  | 0.77437871  | -1.30564832 |
| H  | 2.04399830  | 0.63195503  | 2.85025958  |
| H  | 1.41398343  | -0.81030719 | 3.28723895  |
| H  | 2.40630624  | -0.70891430 | 1.99750498  |
| H  | 1.10140031  | 2.57721341  | 1.38296028  |
| H  | 0.12239850  | 2.50189015  | 0.07569126  |
| H  | -0.49538286 | 2.76759392  | 1.57369001  |
| H  | -1.41398343 | 0.81030719  | 3.28723895  |
| H  | -2.40630624 | 0.70891430  | 1.99750498  |
| H  | -2.04399830 | -0.63195503 | 2.85025958  |
| H  | -1.22805227 | 0.87296647  | -1.28586766 |
| H  | -1.22884812 | -0.77437871 | -1.30564832 |
| H  | -2.47684396 | 0.03644519  | -0.62964053 |
| H  | 0.49538286  | -2.76759392 | 1.57369001  |
| H  | -1.10140031 | -2.57721341 | 1.38296028  |
| H  | -0.12239850 | -2.50189015 | 0.07569126  |
| Mg | -0.00000000 | 0.00000000  | 0.90487357  |
| Cl | 0.00000000  | 2.68333604  | -1.95880545 |
| Cl | -0.00000000 | -2.68333604 | -1.95880545 |

Isomer **A'** of Mg(NH<sub>3</sub>)<sub>6</sub>NaCl at the CAM-B3LYP/6-311++G(d, p) level

|    |             |             |             |
|----|-------------|-------------|-------------|
| N  | -1.54070689 | -0.88952753 | 1.22741709  |
| N  | -1.54346286 | 0.89111870  | -1.48541563 |
| N  | 1.54070689  | -0.88952753 | 1.22741709  |
| N  | 1.54346286  | 0.89111870  | -1.48541563 |
| N  | 0.00000000  | 1.77905507  | 1.22741709  |
| N  | -0.00000000 | -1.78223739 | -1.48541563 |
| H  | -0.81100300 | 2.38905218  | 1.16854545  |
| H  | 0.00000000  | 1.39033472  | 2.18844063  |
| H  | 0.81100300  | 2.38905218  | 1.16854545  |
| H  | -1.24301244 | 0.71765357  | -2.45761366 |
| H  | -2.47878544 | 0.49080671  | -1.42245631 |
| H  | -1.66444380 | 1.90128780  | -1.42245631 |
| H  | 1.24301244  | 0.71765357  | -2.45761366 |
| H  | 1.66444380  | 1.90128780  | -1.42245631 |
| H  | 2.47878544  | 0.49080671  | -1.42245631 |
| H  | -0.00000000 | -1.43530714 | -2.45761366 |
| H  | 0.81434164  | -2.39209452 | -1.42245631 |
| H  | -0.81434164 | -2.39209452 | -1.42245631 |
| H  | 2.47448138  | -0.49217689 | 1.16854545  |
| H  | 1.20406519  | -0.69516736 | 2.18844063  |
| H  | 1.66347838  | -1.89687529 | 1.16854545  |
| H  | -2.47448138 | -0.49217689 | 1.16854545  |
| H  | -1.66347838 | -1.89687529 | 1.16854545  |
| H  | -1.20406519 | -0.69516736 | 2.18844063  |
| Mg | 0.00000000  | 0.00000000  | -0.12144647 |
| Na | 0.00000000  | 0.00000000  | -5.15288893 |
| Cl | 0.00000000  | 0.00000000  | 3.87576997  |

Isomer **B'** of Mg(NH<sub>3</sub>)<sub>6</sub>NaCl at the CAM-B3LYP/6-311++G(d, p) level

|   |             |             |             |
|---|-------------|-------------|-------------|
| N | -0.60079850 | -1.51285138 | 1.56862973  |
| N | 1.59957109  | -0.04058958 | 0.00000000  |
| N | -2.88352389 | 0.06163610  | 0.00000000  |
| N | -0.60079850 | 1.72585352  | -1.51350868 |
| N | -0.60079850 | -1.51285138 | -1.56862973 |
| N | -0.60079850 | 1.72585352  | 1.51350868  |
| H | -0.21771992 | -1.21296633 | -2.46139735 |
| H | 0.06208749  | -2.22380764 | -1.20039323 |
| H | -1.45657925 | -2.01375092 | -1.79117221 |
| H | 2.04353491  | 0.39710786  | -0.80438519 |
| H | 2.04353491  | 0.39710786  | 0.80438519  |
| H | 1.86861298  | -1.03642640 | 0.00000000  |
| H | 0.16579295  | 2.36571769  | -1.24327318 |
| H | -0.41806886 | 1.48003889  | -2.48714483 |



|    |             |             |             |
|----|-------------|-------------|-------------|
| H  | -1.41634857 | 2.33986253  | -1.53157617 |
| H  | 0.16579295  | 2.36571769  | 1.24327318  |
| H  | -1.41634857 | 2.33986253  | 1.53157617  |
| H  | -0.41806886 | 1.48003889  | 2.48714483  |
| H  | -3.25629931 | 0.54285936  | 0.81479422  |
| H  | -3.25629931 | 0.54285936  | -0.81479422 |
| H  | -3.28933609 | -0.87076657 | 0.00000000  |
| H  | 0.06208749  | -2.22380764 | 1.20039323  |
| H  | -0.21771992 | -1.21296633 | 2.46139735  |
| H  | -1.45657925 | -2.01375092 | 1.79117221  |
| Mg | -0.60015790 | 0.07404211  | 0.00000000  |
| Cl | 1.48771607  | -3.30161714 | 0.00000000  |
| Na | 1.64806121  | 4.60606370  | 0.00000000  |

Isomer **C'** of Mg(NH<sub>3</sub>)<sub>6</sub>NaCl at the CAM-B3LYP/6-311++G(d, p) level

|    |             |             |             |
|----|-------------|-------------|-------------|
| N  | -2.78686703 | -0.25637238 | -1.52169830 |
| N  | 0.29470055  | 0.35055509  | -1.66030732 |
| N  | -2.75902046 | -0.43155228 | 1.51419344  |
| N  | 0.30312983  | 0.30355264  | 1.66666220  |
| N  | -1.51108435 | 2.21173421  | 0.06110575  |
| N  | -0.44620197 | -2.12023400 | -0.05509901 |
| H  | -0.58152384 | 2.66282091  | 0.04741596  |
| H  | -2.01869457 | 2.61242902  | -0.73166883 |
| H  | -1.97347312 | 2.57196718  | 0.89981256  |
| H  | 1.16048928  | -0.16040348 | -1.44413329 |
| H  | 0.01623991  | 0.07338224  | -2.60315123 |
| H  | 0.57075632  | 1.33506687  | -1.72663507 |
| H  | 1.15394650  | -0.23635414 | 1.46520837  |
| H  | 0.61111449  | 1.28115829  | 1.71080882  |
| H  | 0.01316003  | 0.06211164  | 2.61571693  |
| H  | 0.58094654  | -2.05562861 | -0.04675425 |
| H  | -0.70247859 | -2.69936923 | 0.74194090  |
| H  | -0.69058120 | -2.65484295 | -0.88636829 |
| H  | -2.38285875 | -0.60145428 | 2.44759548  |
| H  | -3.38621599 | 0.36941094  | 1.60702333  |
| H  | -3.35049827 | -1.23312665 | 1.29236164  |
| H  | -2.49942717 | 0.09741745  | -2.43491889 |
| H  | -3.10233334 | -1.21519879 | -1.67265759 |
| H  | -3.61535591 | 0.28181216  | -1.26286253 |
| Mg | -1.13510469 | 0.01390464  | 0.00214856  |
| Na | 3.17349842  | 1.53626483  | 0.02961782  |
| Cl | 2.77923326  | -1.05651473 | -0.02378294 |

Isomer **D'** of Mg(NH<sub>3</sub>)<sub>6</sub>NaCl at the CAM-B3LYP/6-311++G(d, p) level

|    |             |             |             |
|----|-------------|-------------|-------------|
| N  | 1.54383704  | 0.96861477  | -3.23299076 |
| N  | -0.14899636 | 1.77972953  | -0.59319114 |
| N  | 0.06692648  | -1.82130948 | -3.23299076 |
| N  | -1.46679281 | -1.01889940 | -0.59319114 |
| N  | -1.61076352 | 0.85269471  | -3.23299076 |
| N  | 1.61578917  | -0.76083014 | -0.59319114 |
| H  | -2.53578379 | 0.65737618  | -2.84613517 |
| H  | -1.53826983 | 1.86995104  | -3.28836311 |
| H  | -1.62740667 | 0.51185728  | -4.19553621 |
| H  | -0.09985674 | 1.41905698  | 0.37643280  |
| H  | 0.59844883  | 2.47599265  | -0.65871624 |
| H  | -1.02680187 | 2.30449352  | -0.63803949 |
| H  | -1.17901102 | -0.79600697 | 0.37643280  |
| H  | -2.44349695 | -0.71972443 | -0.65871624 |
| H  | -1.48234900 | -2.04148326 | -0.63803949 |
| H  | 1.27886776  | -0.62305001 | 0.37643280  |
| H  | 1.84504811  | -1.75626822 | -0.65871624 |
| H  | 2.50915087  | -0.26301026 | -0.63803949 |
| H  | -0.85029018 | -2.26715627 | -3.28836311 |
| H  | 0.37042193  | -1.66530416 | -4.19553621 |
| H  | 0.69858742  | -2.52474127 | -2.84613517 |
| H  | 1.83719637  | 1.86736508  | -2.84613517 |
| H  | 2.38856002  | 0.39720523  | -3.28836311 |
| H  | 1.25698475  | 1.15344688  | -4.19553621 |
| Mg | 0.00000000  | 0.00000000  | -1.91456066 |
| Na | 0.00000000  | 0.00000000  | 3.42399633  |
| Cl | 0.00000000  | 0.00000000  | 5.84774473  |

Isomer A'' of  $\text{Mg}(\text{NH}_3)_6\text{Na}_2$  at the CAM-B3LYP/6-311++G(d, p) level

|   |             |             |             |
|---|-------------|-------------|-------------|
| N | 1.54275162  | -0.89070806 | 1.35693084  |
| N | 0.00000000  | 1.78141612  | 1.35693084  |
| N | 0.00000000  | -1.78141612 | -1.35693084 |
| N | -1.54275162 | 0.89070806  | -1.35693084 |
| N | 1.54275162  | 0.89070806  | -1.35693084 |
| N | -1.54275162 | -0.89070806 | 1.35693084  |
| H | 1.66405149  | 1.90067091  | -1.29034227 |
| H | 2.47805503  | 0.49077541  | -1.29034227 |
| H | 1.24587919  | 0.71930869  | -2.33071352 |
| H | -0.81400354 | 2.39144632  | 1.29034227  |
| H | 0.00000000  | 1.43861737  | 2.33071352  |
| H | 0.81400354  | 2.39144632  | 1.29034227  |
| H | -1.66405149 | 1.90067091  | -1.29034227 |
| H | -1.24587919 | 0.71930869  | -2.33071352 |
| H | -2.47805503 | 0.49077541  | -1.29034227 |

|    |             |             |             |
|----|-------------|-------------|-------------|
| H  | -2.47805503 | -0.49077541 | 1.29034227  |
| H  | -1.66405149 | -1.90067091 | 1.29034227  |
| H  | -1.24587919 | -0.71930869 | 2.33071352  |
| H  | -0.00000000 | -1.43861737 | -2.33071352 |
| H  | 0.81400354  | -2.39144632 | -1.29034227 |
| H  | -0.81400354 | -2.39144632 | -1.29034227 |
| H  | 1.24587919  | -0.71930869 | 2.33071352  |
| H  | 1.66405149  | -1.90067091 | 1.29034227  |
| H  | 2.47805503  | -0.49077541 | 1.29034227  |
| Na | 0.00000000  | 0.00000000  | 5.06203771  |
| Na | -0.00000000 | -0.00000000 | -5.06203771 |
| Mg | 0.00000000  | 0.00000000  | 0.00000000  |

Isomer **B''** of  $\text{Mg}(\text{NH}_3)_6\text{Na}_2$  at the CAM-B3LYP/6-311++G(d, p) level

|    |             |             |             |
|----|-------------|-------------|-------------|
| N  | 0.00000000  | 1.79216519  | 0.33187504  |
| N  | 1.55206058  | -0.89608260 | 0.33187504  |
| N  | -1.51876017 | 0.99017932  | 2.97358924  |
| N  | -0.09814036 | -1.81037455 | 2.97358924  |
| N  | 1.61690053  | 0.82019523  | 2.97358924  |
| N  | -1.55206058 | -0.89608260 | 0.33187504  |
| H  | 2.39610301  | 0.16405090  | 3.06881142  |
| H  | 2.02115324  | 1.68817702  | 2.61310124  |
| H  | 1.30439802  | 1.02855720  | 3.92552835  |
| H  | 1.73700501  | -1.89113116 | 0.48366222  |
| H  | 1.25320504  | -0.81322012 | -0.64947092 |
| H  | 2.46159209  | -0.42981308 | 0.38197318  |
| H  | 0.45142757  | -2.59445856 | 2.61310124  |
| H  | 0.23855765  | -1.64392042 | 3.92552835  |
| H  | -1.05597926 | -2.15711152 | 3.06881142  |
| H  | -1.60302509 | -1.91689475 | 0.38197318  |
| H  | -2.50627014 | -0.55872489 | 0.48366222  |
| H  | -1.33087180 | -0.67869734 | -0.64947092 |
| H  | -1.54295567 | 0.61536323  | 3.92552835  |
| H  | -1.34012375 | 1.99306063  | 3.06881142  |
| H  | -2.47258080 | 0.90628154  | 2.61310124  |
| H  | 0.07766676  | 1.49191746  | -0.64947092 |
| H  | -0.85856700 | 2.34670782  | 0.38197318  |
| H  | 0.76926512  | 2.44985605  | 0.48366222  |
| Na | 0.00000000  | 0.00000000  | -3.85590663 |
| Na | 0.00000000  | 0.00000000  | -6.94240688 |
| Mg | 0.00000000  | 0.00000000  | 1.65799019  |

Isomer **a'** of  $\text{Ca}(\text{NH}_3)_6\text{NaCl}$  at the CAM-B3LYP/6-311++G(d, p) level

|   |             |             |            |
|---|-------------|-------------|------------|
| N | -0.34240395 | -2.32435811 | 1.68062049 |
|---|-------------|-------------|------------|

|    |             |             |             |
|----|-------------|-------------|-------------|
| N  | 1.84618837  | 1.46081443  | 0.00000000  |
| N  | -2.51060219 | 0.08276015  | 0.00000000  |
| N  | -0.34240395 | 1.01545741  | -2.15507429 |
| N  | -0.34240395 | -2.32435811 | -1.68062049 |
| N  | -0.34240395 | 1.01545741  | 2.15507429  |
| H  | -0.41787461 | -2.08499812 | -2.66391770 |
| H  | 0.61037575  | -2.65532672 | -1.51745316 |
| H  | -0.97573584 | -3.09932413 | -1.51397783 |
| H  | 1.55788932  | 2.43791632  | 0.00000000  |
| H  | 2.44429499  | 1.30493169  | 0.80719580  |
| H  | 2.44429499  | 1.30493169  | -0.80719580 |
| H  | -0.59628780 | 1.93786126  | -1.77996594 |
| H  | 0.47124897  | 1.16378603  | -2.74901745 |
| H  | -1.10780518 | 0.75898485  | -2.77485868 |
| H  | -0.59628780 | 1.93786126  | 1.77996594  |
| H  | -1.10780518 | 0.75898485  | 2.77485868  |
| H  | 0.47124897  | 1.16378603  | 2.74901745  |
| H  | -2.59204513 | 1.10680305  | 0.00000000  |
| H  | -3.02761100 | -0.24018718 | -0.81517579 |
| H  | -3.02761100 | -0.24018718 | 0.81517579  |
| H  | 0.61037575  | -2.65532672 | 1.51745316  |
| H  | -0.41787461 | -2.08499812 | 2.66391770  |
| H  | -0.97573584 | -3.09932413 | 1.51397783  |
| Cl | 2.37102341  | -1.76036426 | 0.00000000  |
| Na | -1.84940132 | 4.25501458  | 0.00000000  |
| Ca | 0.02535846  | -0.35377774 | 0.00000000  |

Isomer **b'** of Ca(NH<sub>3</sub>)<sub>6</sub>NaCl at the CAM-B3LYP/6-311++G(d, p) level

|    |             |             |             |
|----|-------------|-------------|-------------|
| Ca | 0.00000000  | 0.00000000  | 0.07274861  |
| N  | 1.72083849  | 0.99352656  | 1.64771585  |
| N  | -1.72083849 | 0.99352656  | 1.64771585  |
| N  | 1.76673260  | -1.02002354 | -1.41974487 |
| N  | -1.76673260 | -1.02002354 | -1.41974487 |
| N  | 0.00000000  | 2.04004708  | -1.41974487 |
| N  | -0.00000000 | -1.98705312 | 1.64771585  |
| H  | -0.81154412 | 2.65111442  | -1.39398241 |
| H  | 0.81154412  | 2.65111442  | -1.39398241 |
| H  | 0.00000000  | 1.58795993  | -2.35067593 |
| H  | -2.65806868 | 0.59418148  | 1.62178508  |
| H  | -1.36554169 | 0.78839586  | 2.59366824  |
| H  | -1.84361059 | 2.00486426  | 1.62178508  |
| H  | -2.70170449 | -0.62273939 | -1.39398241 |
| H  | -1.37521363 | -0.79397996 | -2.35067593 |
| H  | -1.89016037 | -2.02837503 | -1.39398241 |

|    |             |             |             |
|----|-------------|-------------|-------------|
| H  | -0.81445809 | -2.59904573 | 1.62178508  |
| H  | 0.81445809  | -2.59904573 | 1.62178508  |
| H  | -0.00000000 | -1.57679172 | 2.59366824  |
| H  | 1.37521363  | -0.79397996 | -2.35067593 |
| H  | 2.70170449  | -0.62273939 | -1.39398241 |
| H  | 1.89016037  | -2.02837503 | -1.39398241 |
| H  | 1.36554169  | 0.78839586  | 2.59366824  |
| H  | 2.65806868  | 0.59418148  | 1.62178508  |
| H  | 1.84361059  | 2.00486426  | 1.62178508  |
| Na | 0.00000000  | 0.00000000  | 5.25538735  |
| Cl | 0.00000000  | 0.00000000  | -3.89102449 |

Isomer **c'** of Ca(NH<sub>3</sub>)<sub>6</sub>NaCl at the CAM-B3LYP/6-311++G(d, p) level

|    |             |             |             |
|----|-------------|-------------|-------------|
| Ca | 0.00000000  | 0.00000000  | 0.00000000  |
| N  | 0.00000000  | 0.00000000  | 2.61134966  |
| N  | 1.38478122  | 0.00000000  | -2.16877701 |
| N  | -1.10327149 | -2.30810872 | 0.19376361  |
| N  | -1.70618699 | 0.04942890  | -1.93581102 |
| N  | 2.21874086  | -1.22735185 | 0.62445456  |
| N  | -1.77180244 | 1.74614298  | 0.65796167  |
| H  | 2.70939697  | -0.34384179 | 0.77300498  |
| H  | 2.35826335  | -1.79642112 | 1.45387808  |
| H  | 2.68082626  | -1.70394804 | -0.14461216 |
| H  | 0.99713821  | 0.80777274  | -2.67305090 |
| H  | 2.36017892  | 0.24401231  | -1.99742449 |
| H  | 1.37956003  | -0.77547533 | -2.83267652 |
| H  | -1.57805124 | -0.58840250 | -2.72347500 |
| H  | -2.70363322 | 0.03424124  | -1.71550992 |
| H  | -1.52130562 | 0.99254423  | -2.31194084 |
| H  | -1.79614879 | 2.35294912  | -0.17164645 |
| H  | -2.74316263 | 1.50511154  | 0.85924515  |
| H  | -1.44819874 | 2.35071140  | 1.41299944  |
| H  | -0.98436916 | -2.82089846 | -0.67769766 |
| H  | -0.76376275 | -2.90649099 | 0.94252357  |
| H  | -2.10676091 | -2.20001946 | 0.32741056  |
| H  | 0.61505026  | 0.81469834  | 2.64850441  |
| H  | -0.87992131 | 0.26576829  | 3.04405761  |
| H  | 0.41318977  | -0.72045515 | 3.19570257  |
| Na | 0.66459168  | 3.58800255  | -1.47425238 |
| Cl | 1.70898671  | 2.08219727  | 0.62218180  |

Isomer **d'** of Ca(NH<sub>3</sub>)<sub>6</sub>NaCl at the CAM-B3LYP/6-311++G(d, p) level

|    |             |             |             |
|----|-------------|-------------|-------------|
| Ca | -0.57677700 | -0.00358900 | -0.01218700 |
| N  | -1.11469900 | 2.48505500  | -0.45978400 |

|    |             |             |             |
|----|-------------|-------------|-------------|
| N  | 0.44581900  | 0.33275300  | 2.33890300  |
| N  | -2.57197900 | -0.53521000 | -1.59199000 |
| N  | -0.41429800 | -2.45595300 | 0.64739800  |
| N  | -2.64182400 | 0.03512700  | 1.57306000  |
| N  | 0.48515800  | -0.99600800 | -2.15744500 |
| H  | -2.42368800 | 0.60349700  | 2.38823000  |
| H  | -3.55004500 | 0.34068600  | 1.23244800  |
| H  | -2.75968700 | -0.91885300 | 1.91081700  |
| H  | 1.14331900  | -0.42029800 | 2.36130100  |
| H  | 0.98996300  | 1.19300400  | 2.27619400  |
| H  | -0.00753300 | 0.31745000  | 3.25131200  |
| H  | -0.75279000 | -2.75276400 | 1.56562000  |
| H  | -0.74523200 | -3.15899400 | -0.01791500 |
| H  | 0.61192600  | -2.58360600 | 0.68745100  |
| H  | 1.21645800  | -1.59545100 | -1.75744700 |
| H  | 0.04249800  | -1.55130200 | -2.88824300 |
| H  | 0.98870500  | -0.23209000 | -2.60755800 |
| H  | -3.47844800 | -0.09682600 | -1.44730000 |
| H  | -2.30099000 | -0.34890500 | -2.55496600 |
| H  | -2.71700200 | -1.54175900 | -1.52527200 |
| H  | -0.13436600 | 2.74467400  | -0.58792600 |
| H  | -1.61892600 | 2.76655500  | -1.29561900 |
| H  | -1.47802300 | 3.04438900  | 0.30685400  |
| Na | 3.35803700  | -0.91598300 | 0.28421300  |
| Cl | 1.89728000  | 1.31046100  | -0.39009200 |

Isomer e' of Ca(NH<sub>3</sub>)<sub>6</sub>NaCl at the CAM-B3LYP/6-311++G(d, p) level

|    |             |             |             |
|----|-------------|-------------|-------------|
| Ca | 0.00000000  | 0.00000000  | 1.78388528  |
| N  | 0.00000000  | 2.03172961  | 0.31437318  |
| N  | 1.75952946  | -1.01586480 | 0.31437318  |
| N  | -1.85314903 | 0.93373354  | 3.26608836  |
| N  | 0.11793755  | -2.07174091 | 3.26608836  |
| N  | 1.73521149  | 1.13800737  | 3.26608836  |
| N  | -1.75952946 | -1.01586480 | 0.31437318  |
| H  | 2.66469888  | 0.98805002  | 2.87183345  |
| H  | 1.59253673  | 2.14825187  | 3.27687060  |
| H  | 1.78554839  | 0.84155447  | 4.24050253  |
| H  | 1.86468145  | -2.03330262 | 0.33871667  |
| H  | 1.41146379  | -0.79885184 | -0.63466693 |
| H  | 2.70618862  | -0.62970701 | 0.35271175  |
| H  | 1.06417233  | -2.45330320 | 3.27687060  |
| H  | -0.16396664 | -1.96710750 | 4.24050253  |
| H  | -0.47667303 | -2.80172194 | 2.87183345  |
| H  | -1.89843658 | -2.02877458 | 0.35271175  |

|    |             |             |             |
|----|-------------|-------------|-------------|
| H  | -2.69323245 | -0.59821019 | 0.33871667  |
| H  | -1.39755788 | -0.82293758 | -0.63466693 |
| H  | -1.62158174 | 1.12555302  | 4.24050253  |
| H  | -2.18802586 | 1.81367192  | 2.87183345  |
| H  | -2.65670906 | 0.30505133  | 3.27687060  |
| H  | -0.01390591 | 1.62178942  | -0.63466693 |
| H  | -0.80775203 | 2.65848159  | 0.35271175  |
| H  | 0.82855100  | 2.63151281  | 0.33871667  |
| Na | 0.00000000  | 0.00000000  | -3.60469383 |
| Cl | 0.00000000  | 0.00000000  | -6.03256883 |

Isomer **a''** of  $\text{Ca}(\text{NH}_3)_6\text{Na}_2$  at the CAM-B3LYP/6-311++G(d, p) level

|    |             |             |             |
|----|-------------|-------------|-------------|
| Ca | 0.00000000  | -0.00000000 | -0.00000000 |
| N  | 1.73033502  | -0.99900939 | 1.55581081  |
| N  | 0.00000000  | 1.99801878  | 1.55581081  |
| N  | -0.00000000 | -1.99801878 | -1.55581081 |
| N  | -1.73033502 | 0.99900939  | -1.55581081 |
| N  | 1.73033502  | 0.99900939  | -1.55581081 |
| N  | -1.73033502 | -0.99900939 | 1.55581081  |
| H  | 1.85306110  | 2.01025773  | -1.52381733 |
| H  | 2.66746481  | 0.59966912  | -1.52381733 |
| H  | 1.38062842  | 0.79710619  | -2.50461510 |
| H  | -0.81440371 | 2.60992685  | 1.52381733  |
| H  | 0.00000000  | 1.59421238  | 2.50461510  |
| H  | 0.81440371  | 2.60992685  | 1.52381733  |
| H  | -1.85306110 | 2.01025773  | -1.52381733 |
| H  | -1.38062842 | 0.79710619  | -2.50461510 |
| H  | -2.66746481 | 0.59966912  | -1.52381733 |
| H  | -2.66746481 | -0.59966912 | 1.52381733  |
| H  | -1.85306110 | -2.01025773 | 1.52381733  |
| H  | -1.38062842 | -0.79710619 | 2.50461510  |
| H  | -0.00000000 | -1.59421238 | -2.50461510 |
| H  | 0.81440371  | -2.60992685 | -1.52381733 |
| H  | -0.81440371 | -2.60992685 | -1.52381733 |
| H  | 1.38062842  | -0.79710619 | 2.50461510  |
| H  | 1.85306110  | -2.01025773 | 1.52381733  |
| H  | 2.66746481  | -0.59966912 | 1.52381733  |
| Na | 0.00000000  | -0.00000000 | 5.17710355  |
| Na | 0.00000000  | -0.00000000 | -5.17710355 |

Isomer **b''** of  $\text{Ca}(\text{NH}_3)_6\text{Na}_2$  at the CAM-B3LYP/6-311++G(d, p) level

|    |             |             |            |
|----|-------------|-------------|------------|
| Ca | -0.00000000 | -0.00000000 | 0.44005033 |
| N  | -1.75126466 | 1.58568081  | 1.39778550 |
| N  | -1.75126466 | -1.58568081 | 1.39778550 |

|    |             |             |             |
|----|-------------|-------------|-------------|
| N  | 1.75126466  | 1.58568081  | 1.39778550  |
| N  | 0.00000000  | -1.59877381 | -1.52250877 |
| N  | 0.00000000  | 1.59877381  | -1.52250877 |
| N  | 1.75126466  | -1.58568081 | 1.39778550  |
| H  | -0.82750564 | 1.41039053  | -2.09068681 |
| H  | 0.00000000  | 2.60019781  | -1.34262051 |
| H  | 0.82750564  | 1.41039053  | -2.09068681 |
| H  | -1.56998349 | -2.58316028 | 1.30153655  |
| H  | -2.09184769 | -1.44680852 | 2.34777481  |
| H  | -2.54893730 | -1.38286952 | 0.78030142  |
| H  | -0.82750564 | -1.41039053 | -2.09068681 |
| H  | 0.82750564  | -1.41039053 | -2.09068681 |
| H  | -0.00000000 | -2.60019781 | -1.34262051 |
| H  | 2.54893730  | -1.38286952 | 0.78030142  |
| H  | 2.09184769  | -1.44680852 | 2.34777481  |
| H  | 1.56998349  | -2.58316028 | 1.30153655  |
| H  | 2.54893730  | 1.38286952  | 0.78030142  |
| H  | 1.56998349  | 2.58316028  | 1.30153655  |
| H  | 2.09184769  | 1.44680852  | 2.34777481  |
| H  | -2.09184769 | 1.44680852  | 2.34777481  |
| H  | -1.56998349 | 2.58316028  | 1.30153655  |
| H  | -2.54893730 | 1.38286952  | 0.78030142  |
| Na | -4.20758256 | 0.00000000  | -1.51337913 |
| Na | 4.20758256  | -0.00000000 | -1.51337913 |

Isomer c'' of Ca(NH<sub>3</sub>)<sub>6</sub>Na<sup>2</sup> at the CAM-B3LYP/6-311++G(d, p) level

|    |             |             |             |
|----|-------------|-------------|-------------|
| Ca | 0.00000000  | 0.00000000  | 1.55316367  |
| N  | 0.00000000  | 2.01078856  | 0.03585938  |
| N  | 1.74139397  | -1.00539428 | 0.03585938  |
| N  | -1.74400269 | 1.06215493  | 3.05776519  |
| N  | -0.04785181 | -2.04142810 | 3.05776519  |
| N  | 1.79185450  | 0.97927317  | 3.05776519  |
| N  | -1.74139397 | -1.00539428 | 0.03585938  |
| H  | 2.68400107  | 0.49037702  | 2.95961923  |
| H  | 1.97980651  | 1.96101884  | 2.84435319  |
| H  | 1.55424311  | 0.94359599  | 4.05163398  |
| H  | 1.86587011  | -2.01636676 | 0.12509989  |
| H  | 1.44269260  | -0.84228162 | -0.93444266 |
| H  | 2.67457275  | -0.59495598 | 0.11465847  |
| H  | 0.70838888  | -2.69507215 | 2.84435319  |
| H  | 0.04005654  | -1.81781201 | 4.05163398  |
| H  | -0.91732159 | -2.56960162 | 2.95961923  |
| H  | -1.85253337 | -2.01876996 | 0.11465847  |
| H  | -2.67915989 | -0.60770753 | 0.12509989  |



|    |             |             |             |
|----|-------------|-------------|-------------|
| H  | -1.45078358 | -0.82826763 | -0.93444266 |
| H  | -1.59429965 | 0.87421602  | 4.05163398  |
| H  | -1.76667949 | 2.07922461  | 2.95961923  |
| H  | -2.68819539 | 0.73405331  | 2.84435319  |
| H  | 0.00809098  | 1.67054925  | -0.93444266 |
| H  | -0.82203938 | 2.61372594  | 0.11465847  |
| H  | 0.81328978  | 2.62407429  | 0.12509989  |
| Na | 0.00000000  | 0.00000000  | -4.06726326 |
| Na | 0.00000000  | 0.00000000  | -7.16111451 |
